# Supplementary material for: Stress-Induced Premature Senescence Related to Oxidative Stress in the Developmental Programming of Nonalcoholic Fatty Liver Disease in a Rat Model of Intrauterine Growth Restriction
Source: MDPI journal article supplement (doi:10.3390/antiox11091695), 2022-08-29
Supplement: s1 [file s1]

**Stress-induced premature senescence related to oxidative stress in the developmental programming of nonalcoholic fatty liver disease in a rat model of intrauterine growth restriction**

Basile Keshavjee, Valentine Lambelet, Hanna Coppola, David Viertl, John O. Prior, Laurent Kappeler, Jean-Baptiste Armengaud, Jean-Pierre Chouraqui, Hassib Chehade, Paul-Emmanuel Vanderriele, Manon Allouche, Anne Balsiger, Alexandre Sarre, Anne-Christine Peyter, Umberto Simeoni and Catherine Yzydorczyk

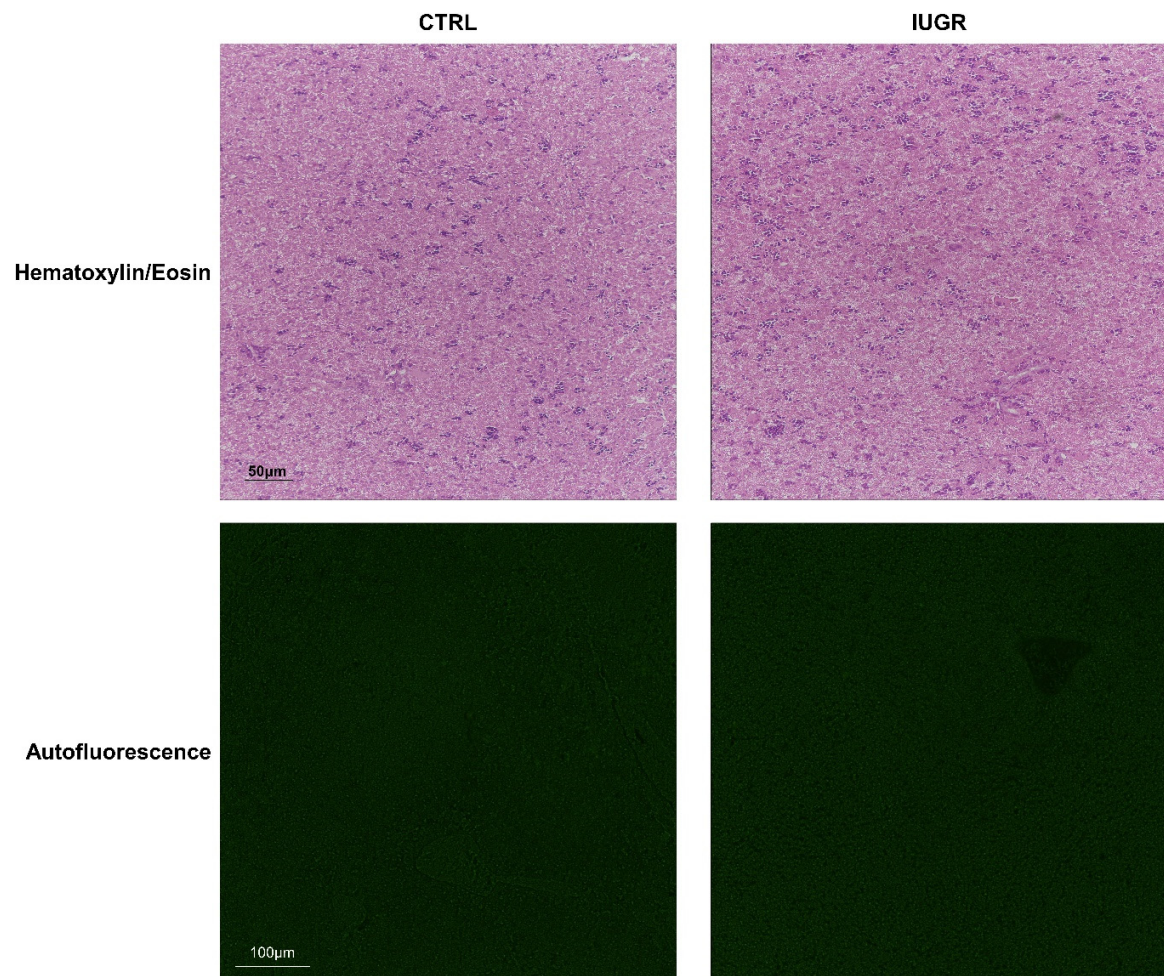

**Supplementary Figure S1.** Liver structure and lipofuscin detection in CTRL and IUGR males at birth. The liver structure was evaluated using hematoxylin/eosin (H/E) staining and the lipofuscin detection was investigated using autofluorescence.  $n = 4$  animals/group. Magnification (20 $\times$ ). Scale bar = 50 and 100  $\mu\text{m}$ .

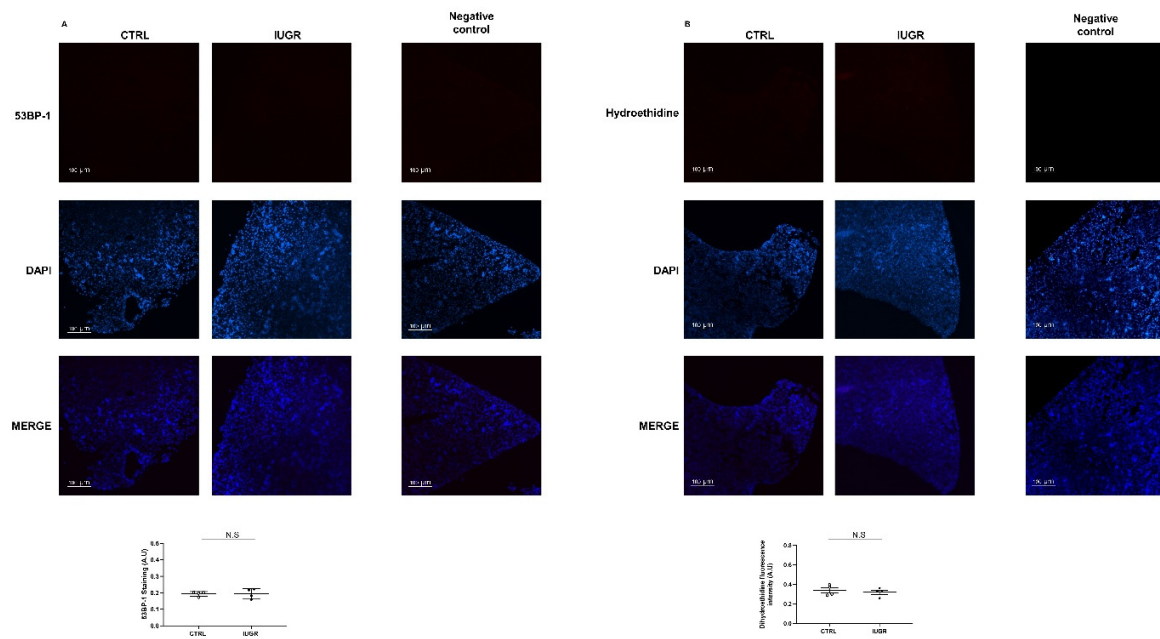

**Supplementary Figure S2.** Oxidative stress evaluation in the liver from CTRL and IUGR males at birth. The DNA double-strand breaks were evaluated by 53BP-1 staining (**A**) and the superoxide anion production was evaluated using hydroethidine staining (**B**). A negative control was performed. Nuclei were counterstained with DAPI. N.S: not significant.  $n = 4$  animals/group. Magnification (20 $\times$ ). Scale bar = 100  $\mu$ m.
